# Supplementary material for: The February 2018 seismic swarm in São Miguel, Azores
Source: Frontiers journal article supplement (doi:10.3389/feart.2023.1144151), 2023-07-10

Supplementary Material

The February 2018 Seismic Swarm in São Miguel, Azores

Soares A.1*, Custódio S.1, Cesca S.2, Silva R.3,4, Vuan A.5,6, Mendes V.B.1

1Instituto Dom Luiz, Faculdade de Ciências da Universidade de Lisboa, Lisbon, Portugal

2GFZ German Research Center for Geosciences, Potsdam, Germany

3CIVISA Centro de Informação e Vigilância Sismovulcânica dos Açores, S. Miguel Island - Azores, Portugal

4IVAR Instituto de Investigação em Vulcanologia e Avaliação de Riscos

5OGS National Institute of Oceanography and Applied Geophysics, Trieste Italy

6INGV National Institute of Geophysics and Vulcanology, Rome, Italy

*** Correspondence:**Analdyne Soares
analdyne.soares@edu.ulisboa.pt

# Supplementary Figures and Tables

## Supplementary Figures

**
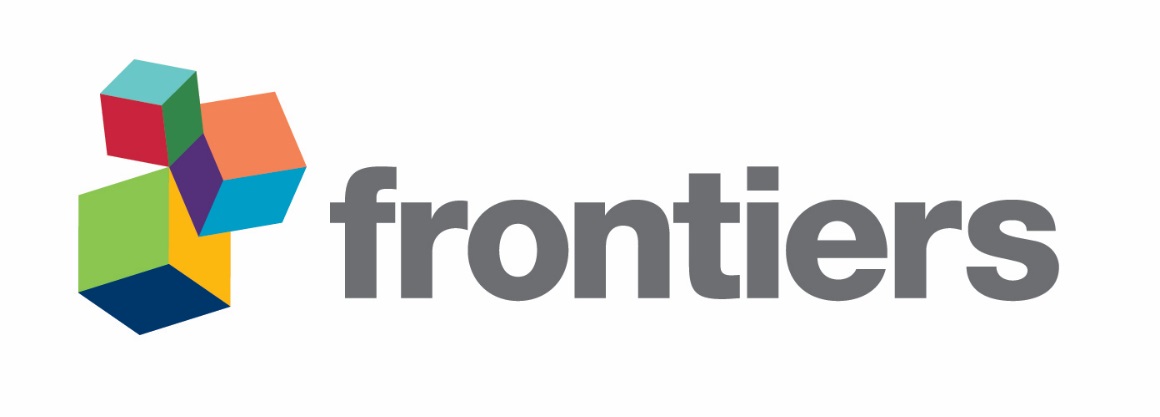
**

**Supplementary Figure 1.** Hypocentral 2D histograms of the earthquakes located with Loki, using the same grid used for location. (a) Map and (b) longitude and (c) latitude cross-sections of the 409 events with coherence higher or equal to 0.5, using velocity model *rfcmlaa*. The blue cross represents the average location of the selected events. The cluster is more populated between the Fogo volcano and the Congro fissural complex at depths of 7-15 km.
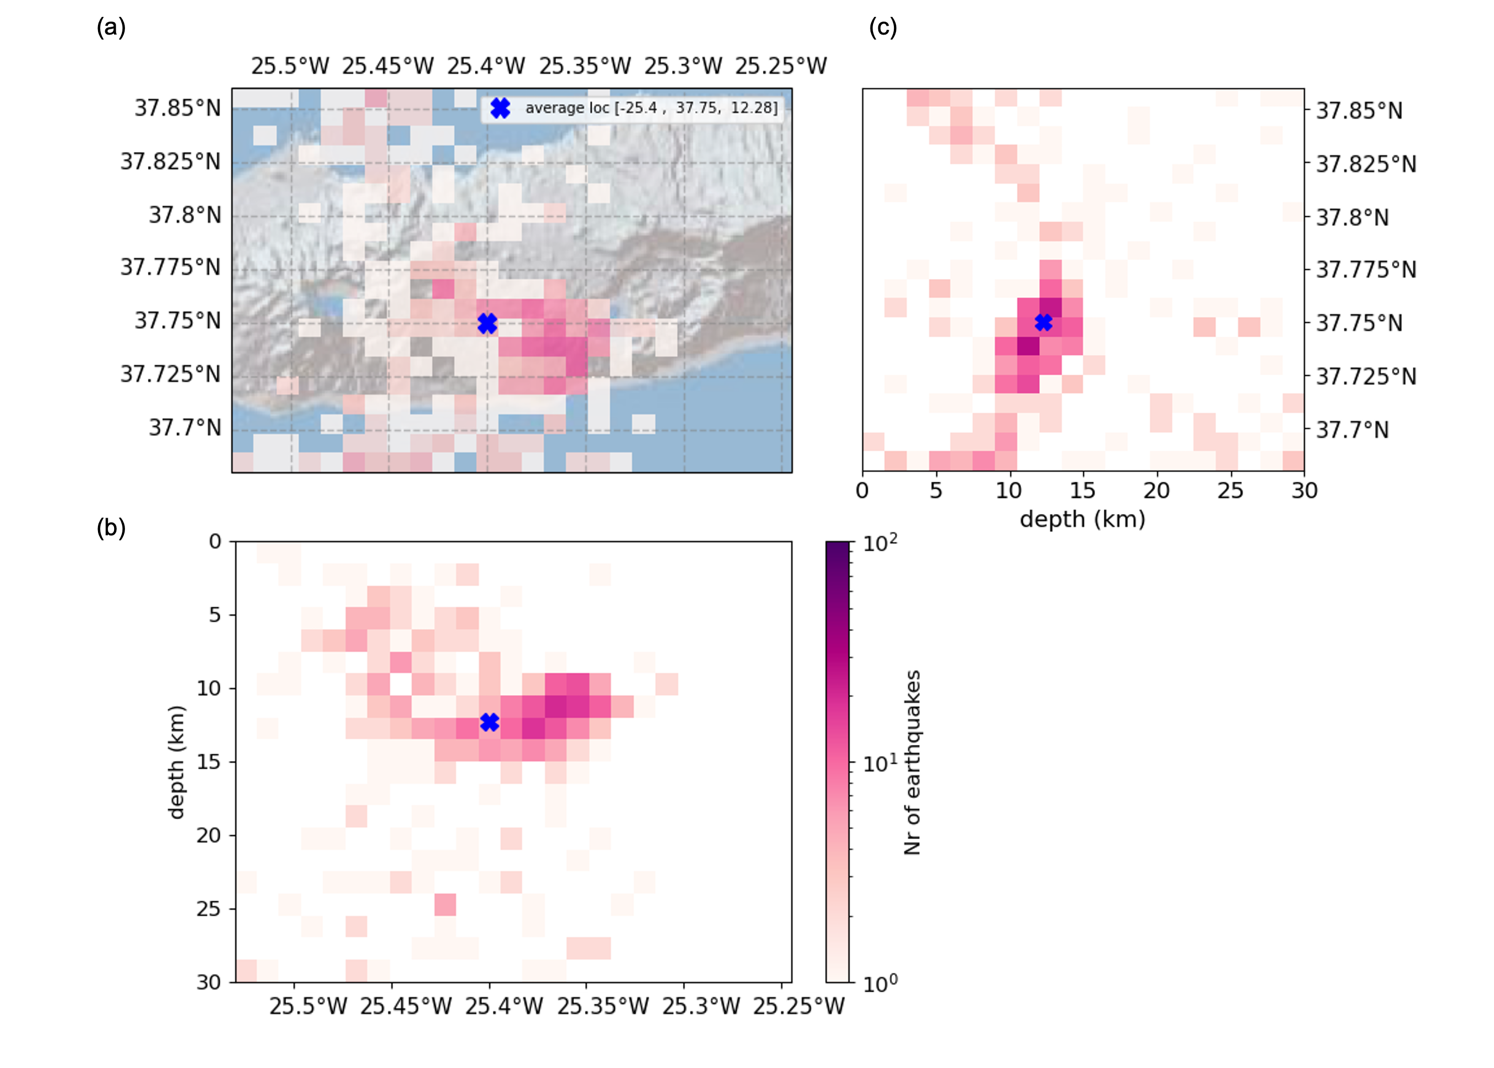


**Supplementary Figure 2.** Temporal evolution of the cumulative number of earthquakes after each step of our workflow, using the *rfcmlaa* velocity model: (a) IPMA (solid green line) and CIVISA (solid gray) reference catalogs, (b) Lassie detections, (c) Lassie revised detections, (d) Loki results with coherence ≥ 0.5 and (e) Final earthquake catalog obtained with the template matching. Results after each step are marked with solid red lines, whereas the CIVISA catalog is shown with a solid gray line for comparison. The automatic process could reproduce ~ 84% of the manually picked CIVISA catalog.


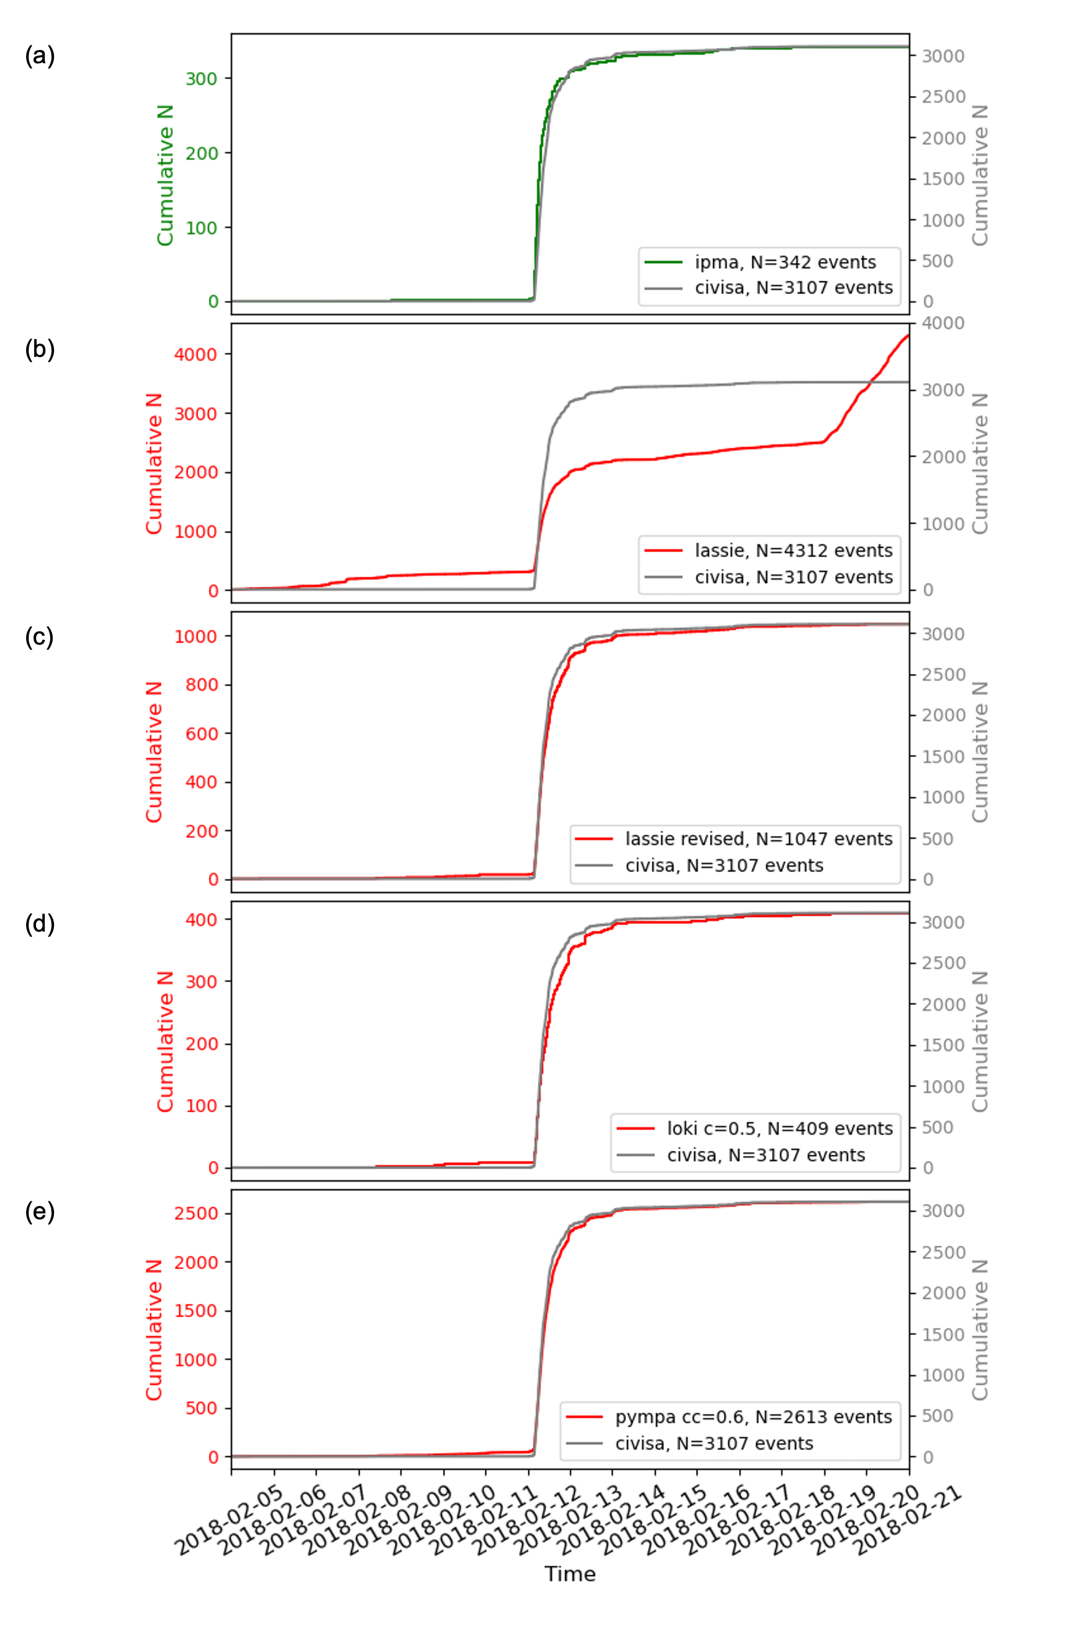

Supplement: Data_Sheet_1.docx [file Data_Sheet_1.docx]
